# Supplementary material for: Delta-like 1-mediated cis-inhibition of Jagged1/2 signalling inhibits differentiation of human epidermal cells in culture
Source: PubMed Central journal article supplement (PMC6658703; doi:10.1038/s41598-019-47232-2), 2019-07-25
Supplement: 41598_2019_47232_MOESM1_ESM.pdf [file 41598_2019_47232_MOESM1_ESM.pdf]

# **Delta-like 1-mediated cis-inhibition of Jagged1/2 signalling inhibits differentiation of human epidermal cells in culture**

Victor A. Negri<sup>1</sup>, Meike Logtenberg<sup>1,2</sup>, Lisa M. Renz<sup>1,3</sup>, Bénédicte Oules<sup>1</sup>, Gernot Walko<sup>1,4,\*†</sup>, and Fiona M. Watt<sup>1,\*†</sup>

<sup>1</sup>Centre for Stem Cells and Regenerative Medicine, Faculty of Life Sciences & Medicine, King's College London, 28th Floor, Tower Wing, Guy's Hospital, SE1 9RT London, UK.

<sup>2</sup>Current address: Division of Immunology, The Netherlands Cancer Institute, Postbus 90203, 1006 BE Amsterdam, The Netherlands.

<sup>3</sup>Current address: Research Institute for Applied Bioanalytics and Drug Development, IMC University of Applied Sciences, A-3500 Krems an der Donau, Austria.

<sup>4</sup>Current address: Department of Biology and Biochemistry, University of Bath, Claverton Down, Bath BA2 7AY, United Kingdom

\*Corresponding author. (email: [g.walko@bath.ac.uk](mailto:g.walko@bath.ac.uk))

\*Corresponding author. (email: [fiona.watt@kcl.ac.uk](mailto:fiona.watt@kcl.ac.uk))

†These authors contributed equally to this work.

## Negri et al. Supplementary Information

**Supplementary Figure 1** Validation of shRNA-mediated gene silencing of Notch receptor paralogues. **(a, b)** Keratinocytes (strain kn) expressing either a non-targeting control shRNA (shNTC), or Notch receptor paralogue-specific shRNAs (set 2, see Supplementary Table 5) were cultured under conditions enabling formation of epidermal sheets (see Materials and Methods). **(a)** Western blot analysis using antibodies against the TMICD and NEXT fragment of Notch1, 2 or 3, or ITG $\beta$ 1. Tubulin was used as loading control. Asterisks indicate the unprocessed precursor proteins also detected by Notch receptor antibodies. Numbers below lanes are protein ratios relative to an arbitrary level of 1.0 set for control samples (shNTC). **(b)** Q-RT PCR analysis of Notch receptor mRNA levels. Data shown are from  $n = 1$  experiment performed with  $n = 3$  biological replicates (independent lentiviral infections). Individual data points represent the fold change in mRNA abundance (normalized to the mean of 18sRNA and TBP) compared to shNTC in each experiment. Bars represent the means.

**Supplementary Figure 2** Image analysis workflows and validation of microbead functionalisation strategy. **(a)** Image analysis pipeline in Harmony software for identification of single differentiating cells. Input images (1) are segmented to identify nuclei (2) and image regions occupied by cells (3). Single cells and cell clusters are recognised using linear classifiers defined through PhenoLOGIC machine learning (4). Border objects and image artefacts are discarded via morphology and intensity assessment on nuclei and on cells (5). Single cells undergoing terminal differentiation are identified based on TGM1 fluorescence over threshold in the single cell population (6). **(b)** Percentage of terminally differentiating (TGM1-positive) cells in the experiments shown in Fig. 3b. Bars represent the means from  $n = 3$  independent experiments. Error bars represent S.D. **(c)** Representative images of FlashRed-labelled microbeads functionalised with recombinant E-cadherin molecules and immunolabelled with anti-E-cadherin antibodies. Scale bar, 50  $\mu$ m. **(d)** Quantification of microbead attachment to single cells. Cells were captured on micro-patterned substrates and incubated for 24 hours with microbeads (functionalised with recombinant E-cadherin) suspended in culture medium with high (1.8 mM) or low (0.05 mM) concentrations of CaCl<sub>2</sub>. Data shown are from  $n = 1$  experiment performed with  $n = 2$  biological replicates (independent bead incubations on separate microchips). Individual data points represent the percentage of

cells with attached microbeads in each experiment. Bars represent the means. (e) Representative image (maximum intensity projection) of keratinocytes with attached microbeads (functionalised with recombinant Fc-tagged E-cadherin molecules), immunolabelled with antibodies against  $\alpha$ -catenin and counterstained with phalloidin to label filamentous actin. Arrows indicate clustering of endogenous  $\alpha$ -catenin molecules at the microbead-cell interface, demonstrating adherens junction formation. Scale bar, 50  $\mu$ m. (f) Image analysis pipeline in Harmony software for identification of single cells with attached beads. Input images (1) are segmented to identify nuclei (2) and image regions occupied by cells (3). Single cells and cell clusters are recognised using linear classifiers defined through PhenoLOGIC machine learning (4). Border objects and image artefacts are discarded via morphology and intensity assessment on nuclei and on cells (5, 6). Fluorescent microbeads are detected using the spot identification module (7). Single cells with attached beads are identified based on bead fluorescence over threshold in the single cell population (8).

**Supplementary Figure 3** Overexpression of zDLL1 in keratinocytes. (a) Representative images (maximum intensity projections) of keratinocytes (strain km) stably expressing zebrafish Dll1 (zDll1) or the empty vector (EV), immunolabelled with antibodies against zDll1 and counterstained with DAPI to reveal nuclei. Arrowheads, localisation of zDll1 at areas of cell-cell contact; asterisks, vesicular localisation of zDll1<sup>32</sup>. Scale bar, 100  $\mu$ m. (b) Q-RT PCR analysis of mRNA levels of endogenous (hDll1) and zebrafish (zDll1) Dll1 in keratinocytes (experiment 1: strain km, experiment 2: strain kn; see Fig. 3f, g) expressing zDLL1 or EV. Data shown are from n = 2 technical replicates. Individual data points represent the mean  $\Delta$ Cq expression (normalized to the mean of GAPDH and TBP). Bars represent the means.

**Supplementary Figure 4** Uncropped western blots.

a

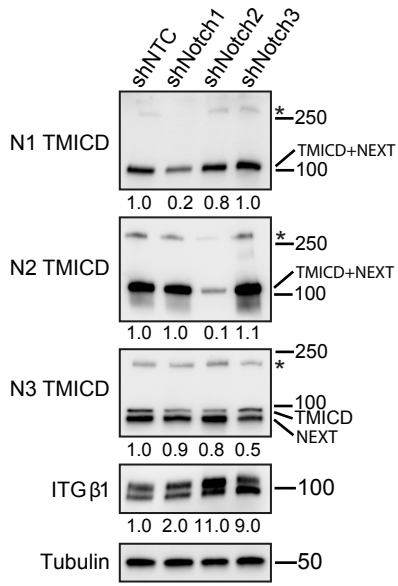

b

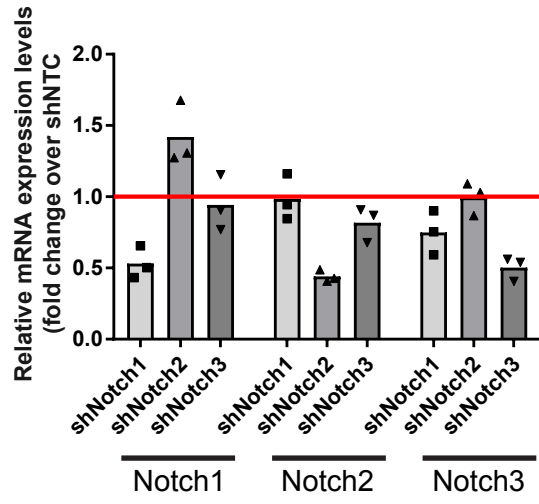



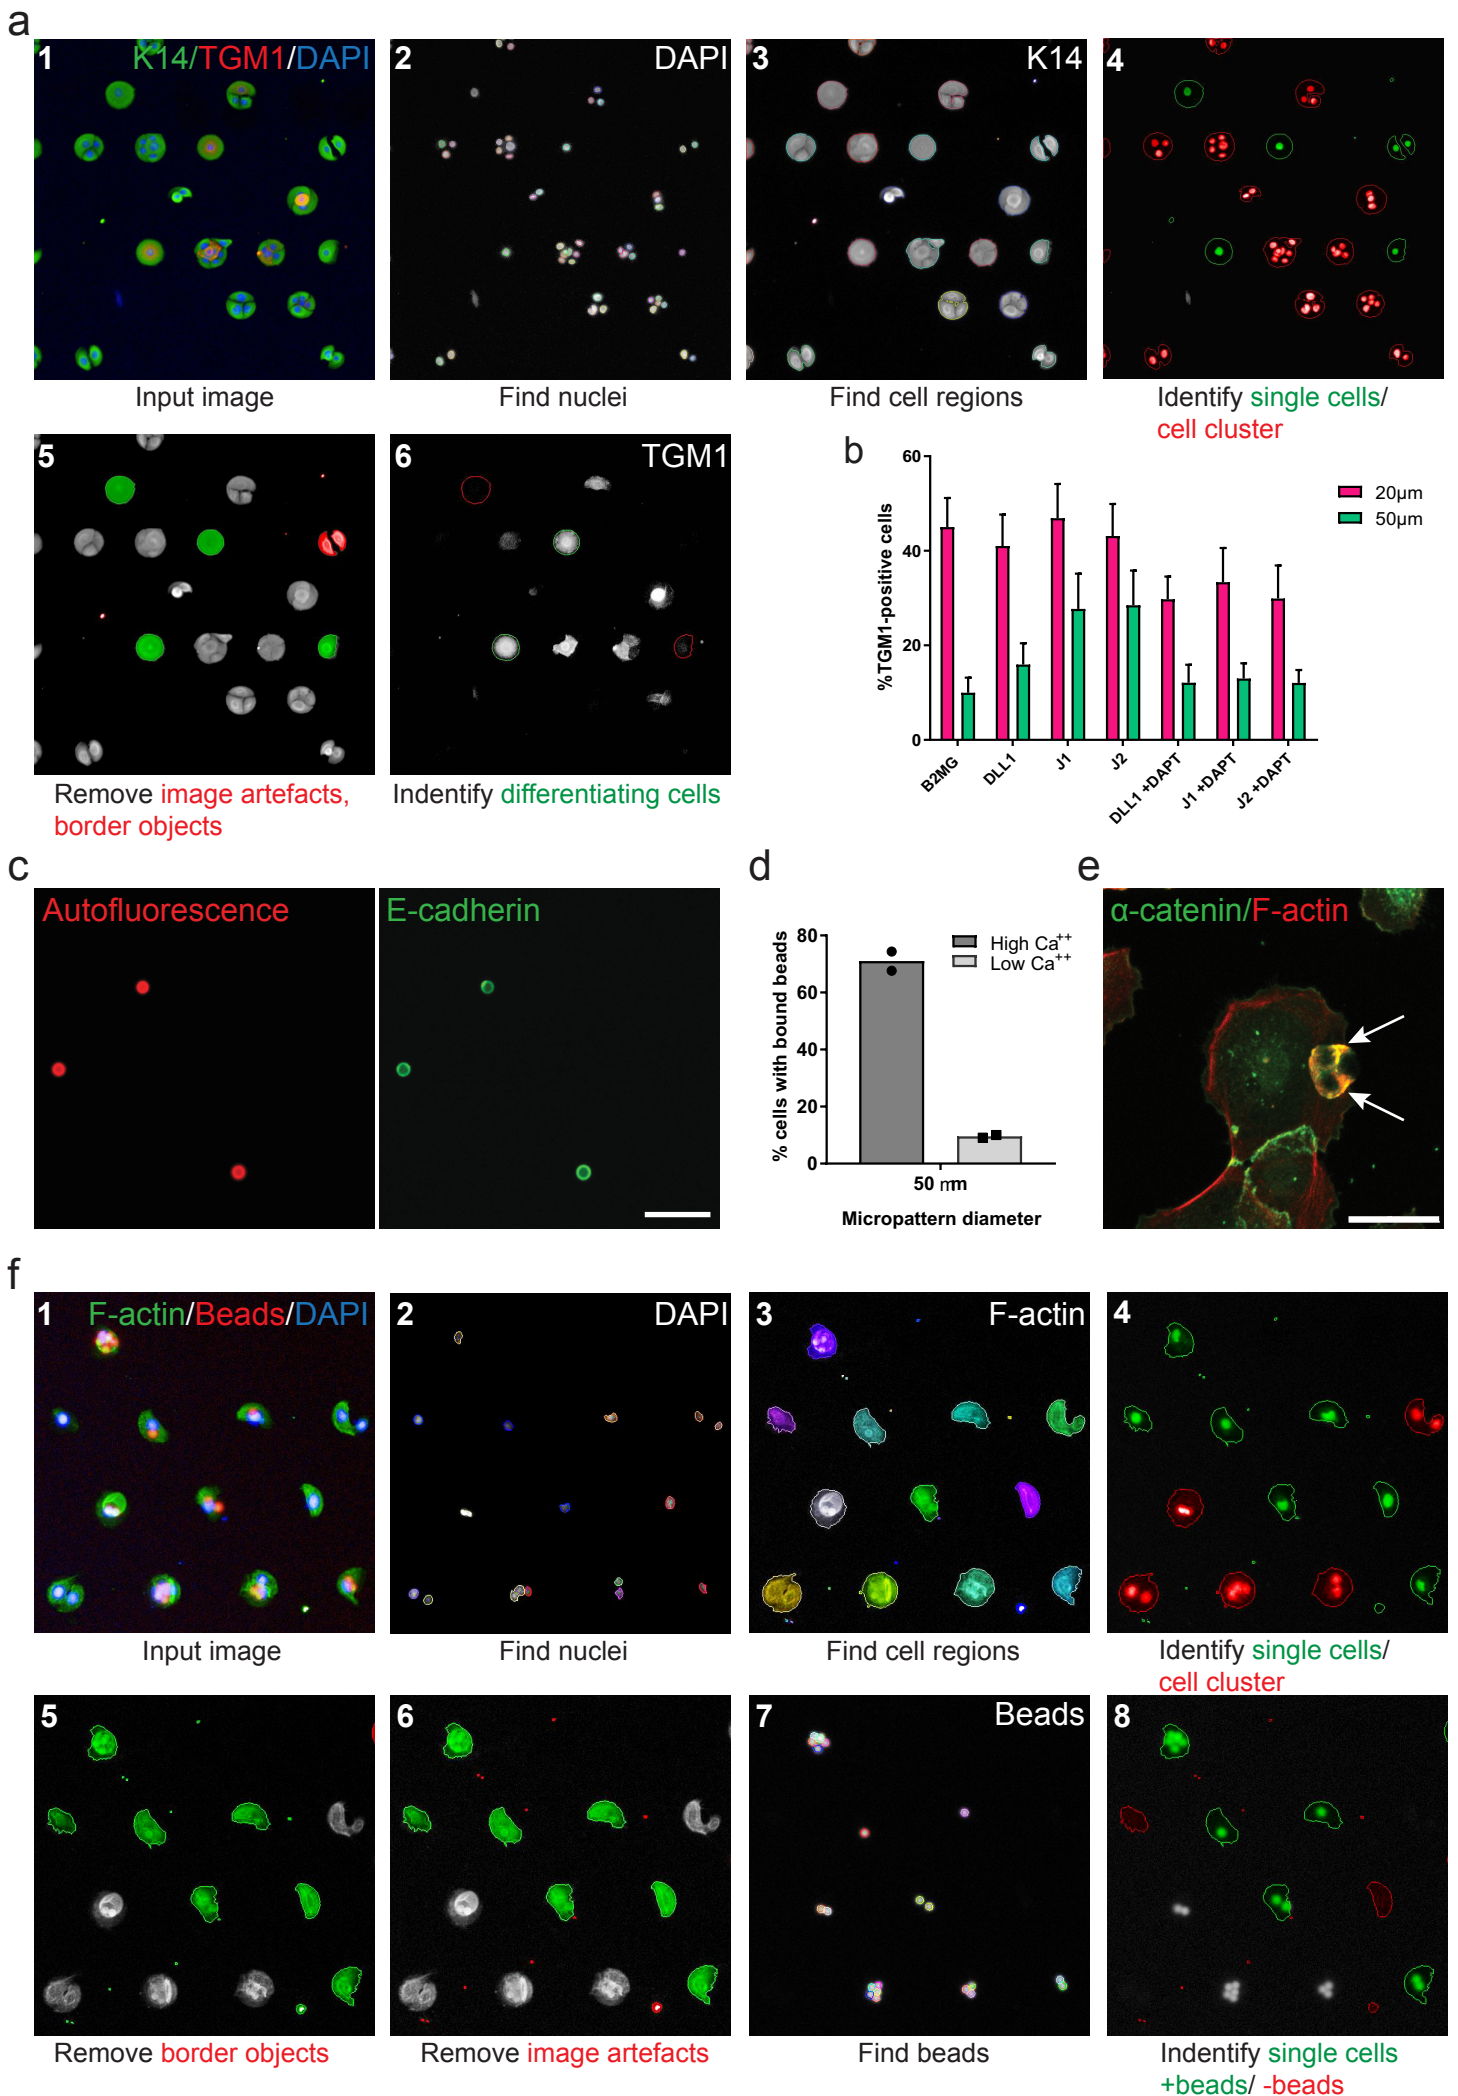

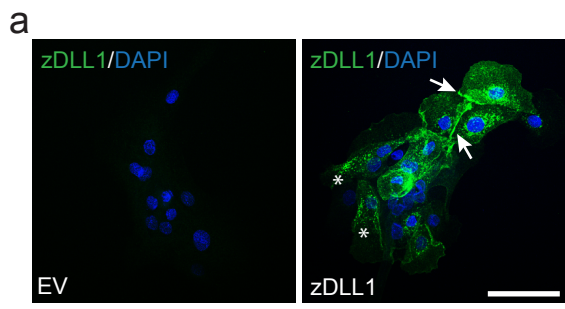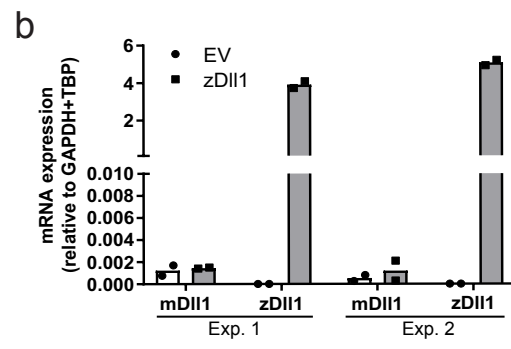

Fig 1i

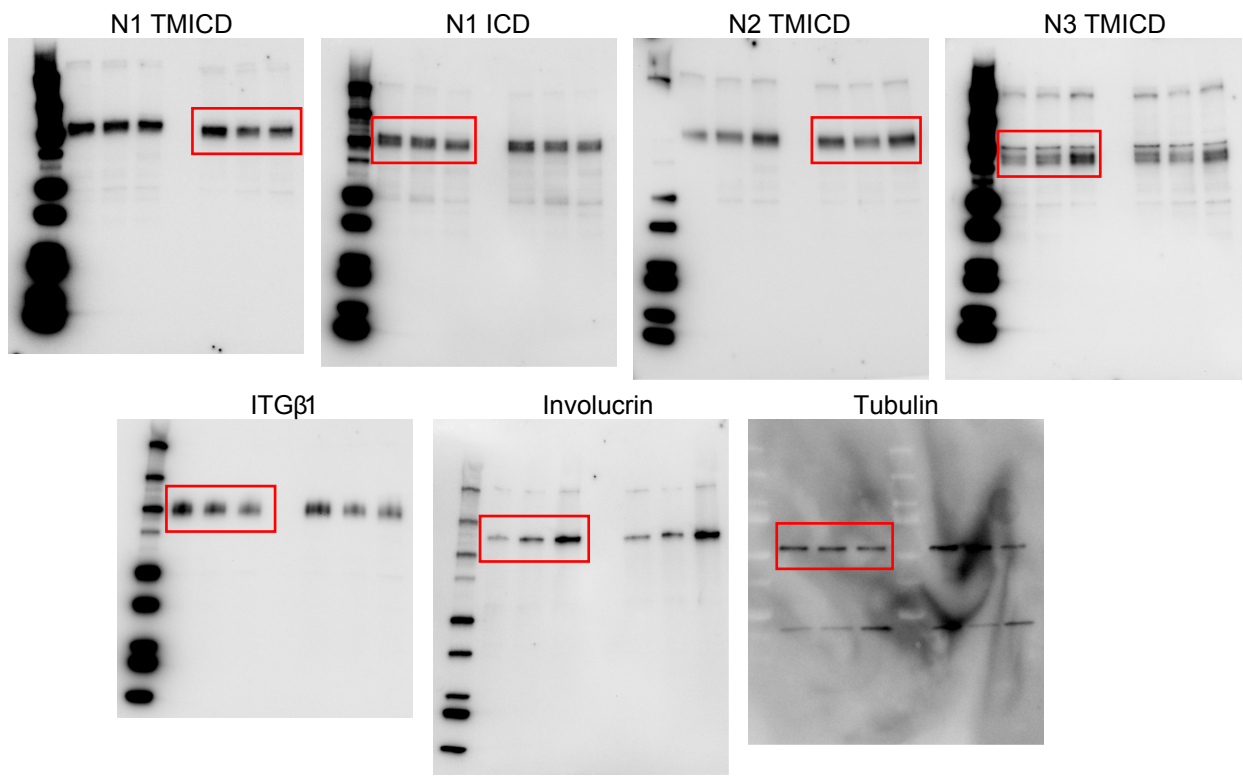

Fig 1j

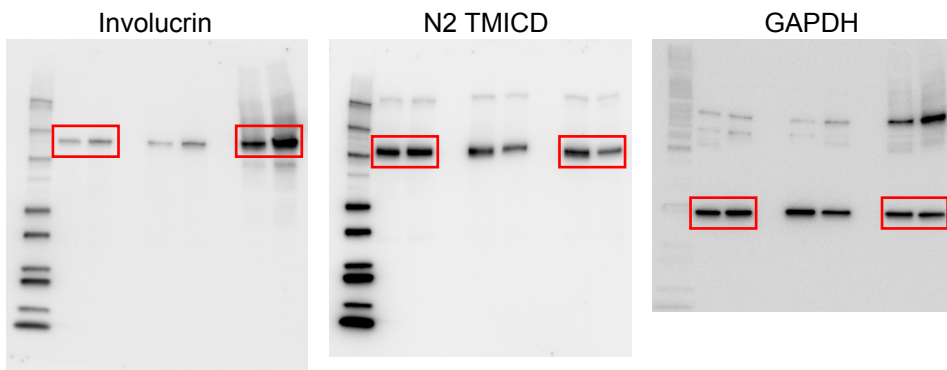

Fig. 2a

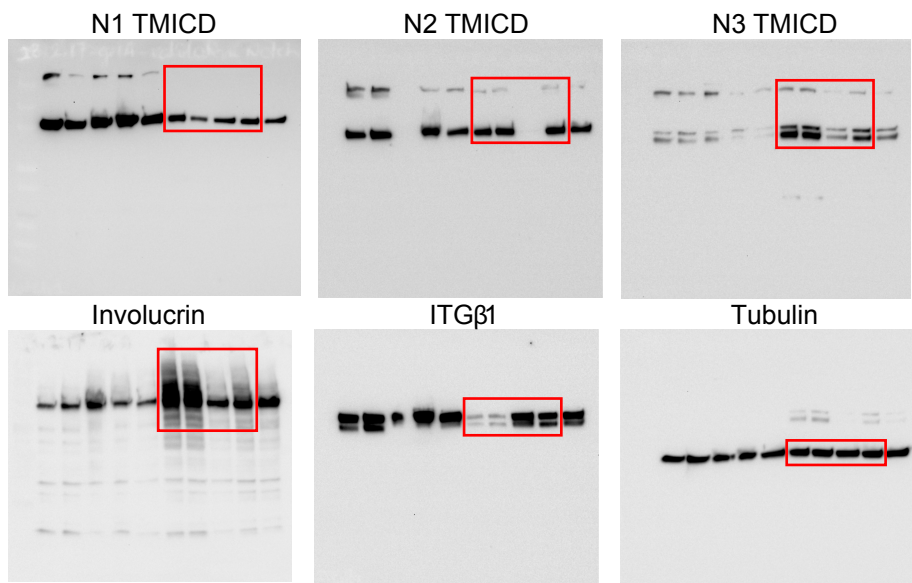

Fig 2i

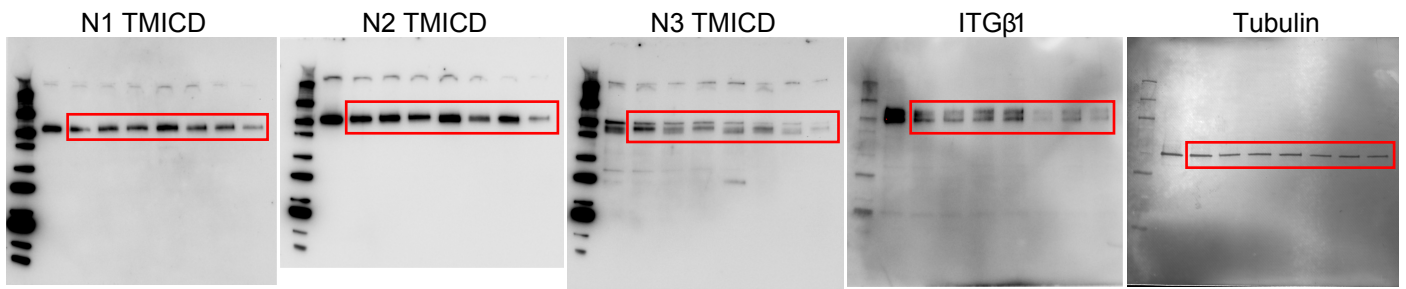

Fig S1a

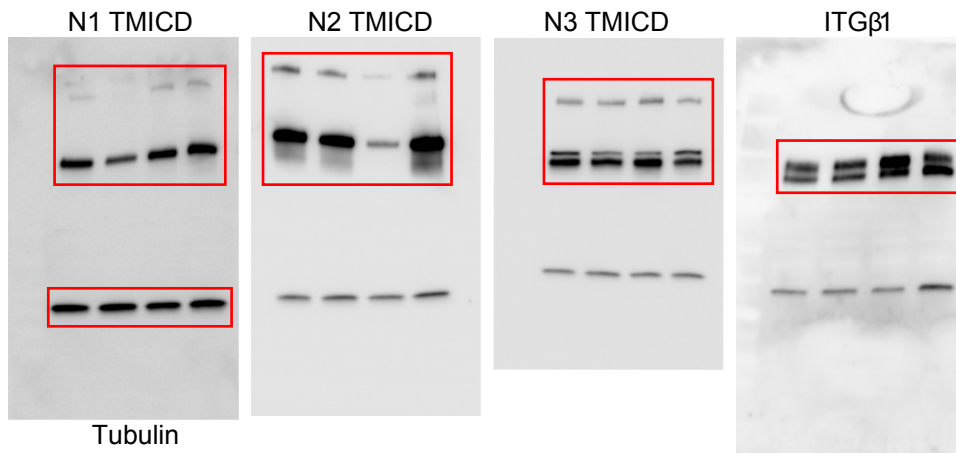

## Supplementary Table 1

### Effect of Notch1 knockdown on clonal growth of keratinocytes.

Keratinocytes (strain km) were transduced with the indicated shRNAs and cultured on a fibroblast feeder layer. Data are the mean  $\pm$  S.D. from three experiments.

| shRNA    | % abortive clones | S.D. |
|----------|-------------------|------|
| shNTC    | 83.8              | 7.65 |
| shNotch1 | 57.4              | 8.51 |

Supplementary Table 2:

Holm-Sidak's multiple comparisons test corresponding to Figure 3b

| Pairwise comparison       | 20 $\mu$ m islands |              |         |              | 50 $\mu$ m islands |              |         |              |
|---------------------------|--------------------|--------------|---------|--------------|--------------------|--------------|---------|--------------|
|                           | Mean Diff.         | Significant? | Summary | Adj. P Value | Mean Diff.         | Significant? | Summary | Adj. P Value |
| Ctrl vs. DLL1 +DAPT       | 0.343              | <b>Yes</b>   | *       | 0.0178       | -0.1386            | No           | ns      | 0.9975       |
| Ctrl vs. DLL1 -DAPT       | 0.09616            | No           | ns      | 0.9146       | -0.5571            | No           | ns      | 0.919        |
| Ctrl vs. J1 +DAPT         | 0.2726             | No           | ns      | 0.0721       | -0.392             | No           | ns      | 0.9831       |
| Ctrl vs. J1 -DAPT         | -0.04238           | No           | ns      | 0.9636       | -1.899             | <b>Yes</b>   | **      | 0.0092       |
| Ctrl vs. J2 +DAPT         | 0.3505             | <b>Yes</b>   | *       | 0.0157       | -0.3032            | No           | ns      | 0.9947       |
| Ctrl vs. J2 -DAPT         | 0.04715            | No           | ns      | 0.9636       | -2.005             | <b>Yes</b>   | **      | 0.006        |
| DLL1 +DAPT vs. DLL1 -DAPT | -0.2468            | No           | ns      | 0.1127       | -0.4185            | No           | ns      | 0.9829       |
| DLL1 +DAPT vs. J1 +DAPT   | -0.07032           | No           | ns      | 0.9333       | -0.2534            | No           | ns      | 0.9965       |
| DLL1 +DAPT vs. J1 -DAPT   | -0.3853            | <b>Yes</b>   | **      | 0.0074       | -1.76              | <b>Yes</b>   | *       | 0.0157       |
| DLL1 +DAPT vs. J2 +DAPT   | 0.007503           | No           | ns      | 0.9636       | -0.1646            | No           | ns      | 0.9975       |
| DLL1 +DAPT vs. J2 -DAPT   | -0.2958            | <b>Yes</b>   | *       | 0.0449       | -1.867             | <b>Yes</b>   | *       | 0.0101       |
| DLL1 -DAPT vs. J1 +DAPT   | 0.1765             | No           | ns      | 0.4089       | 0.1651             | No           | ns      | 0.9975       |
| DLL1 -DAPT vs. J1 -DAPT   | -0.1385            | No           | ns      | 0.6716       | -1.342             | No           | ns      | 0.0733       |
| DLL1 -DAPT vs. J2 +DAPT   | 0.2543             | No           | ns      | 0.1025       | 0.2538             | No           | ns      | 0.9965       |
| DLL1 -DAPT vs. J2 -DAPT   | -0.04902           | No           | ns      | 0.9636       | -1.448             | <b>Yes</b>   | *       | 0.0484       |
| J1 +DAPT vs. J1 -DAPT     | -0.315             | <b>Yes</b>   | *       | 0.0323       | -1.507             | <b>Yes</b>   | *       | 0.0396       |
| J1 +DAPT vs. J2 +DAPT     | 0.07782            | No           | ns      | 0.9333       | 0.08875            | No           | ns      | 0.9975       |
| J1 +DAPT vs. J2 -DAPT     | -0.2255            | No           | ns      | 0.1669       | -1.613             | <b>Yes</b>   | *       | 0.0275       |
| J1 -DAPT vs. J2 +DAPT     | 0.3928             | <b>Yes</b>   | **      | 0.0066       | 1.596              | <b>Yes</b>   | *       | 0.0281       |
| J1 -DAPT vs. J2 -DAPT     | 0.08953            | No           | ns      | 0.9158       | -0.1064            | No           | ns      | 0.9975       |
| J2 +DAPT vs. J2 -DAPT     | -0.3033            | <b>Yes</b>   | *       | 0.0401       | -1.702             | <b>Yes</b>   | *       | 0.0194       |

**Supplementary Table 3: List of qPCR primers and Taqman probes**

**qPCR primer**

| Gene   | Forward primer         | Reverse primer          |
|--------|------------------------|-------------------------|
| 18sRNA | GCAATTATCCCCATGAACG    | GGCCTCACTAAACCATCCAA    |
| TBP    | GTGACCCAGCATCACTGTTTC  | GAGCATCTCCAGCACACTCT    |
| HES1   | TCAACACGACACCGGATAAAC  | GCCGCGAGCTATCTTTCTTC    |
| HEY1   | GTTCCGGCTCTAGGTTCCATGT | CGTCGGCGCTTCTCAATTATTC  |
| IRF6   | GCTCTCTCCCAATGACCTGGA  | CCATGACGTCCAGCAGCTTGTA  |
| TGM1   | GTTGCCCTTTGACCCCGCA    | CCCCGTGGTCAAACCTGGCCG   |
| IVL    | GCCTCAGCCTTACTGTGAGT   | TGTTTCATTTGCTCCTGATGG   |
| PPL    | GCAAGAGTGACCTGGCTCGGCT | GCCGCATCCGCCTCTAGCAC    |
| Notch1 | TCCACCAGTTTGAATGGTCA   | AGCTCATCATCTGGGACAGG    |
| Notch2 | GATCACCCGAATGGCTATGAAT | GGGGTCACAGTTGTCAATGTT   |
| Notch3 | TGGCGACCTCACTTACGACT   | CACTGGCAGTTATAGGTGTTGAC |
| Notch4 | TGTGAACGTGATGTCAACGAG  | ACAGTCTGGGCCTATGAAACC   |

**Taqman probes**

| Gene     | Code          |
|----------|---------------|
| 18sRNA   | Hs03003631_g1 |
| GAPDH    | Hs02786624_g1 |
| Jagged 1 | Hs01070032_m1 |
| Jagged 2 | Hs00171432_m1 |
| Dll1     | Hs00194509_m1 |
| Dll3     | Hs01085096_m1 |
| Dll4     | Hs00184092_m1 |

**Supplementary Table 4: List of siRNAs**

| Catalog Number | Gene Symbol | RefSeq                  | Sequence                    |
|----------------|-------------|-------------------------|-----------------------------|
| SR309129       | D11         | NM_005618, XM_005266934 | CGCAGAUCAAGAACCACCAACAAAGAA |
| SR309129       | D11         | NM_005618, XM_005266934 | UGAACUGAAUUACGCUAUAAAGAAACA |



Supplementary Table 5: List of MISSION shRNA lentiviral transduction particles

| shRNA set | Product Number   | TRC Number | Gene target | Clone ID              | Sequence                                                      |
|-----------|------------------|------------|-------------|-----------------------|---------------------------------------------------------------|
| 2         | SHCLNV-NM_017617 | TRCN0000   | Notch1      | NM_017617-X-903s1c1   | CCGGGATGCCAAATGCCCTGCCGCAAGACTGGAGTTCTGGCAGGCAATTTGGCATCTTTTT |
| 1         | SHCLNV-NM_017617 | TRCN0000   | Notch1      | NM_017617-3-6258s21c1 | CCGGCCCGGGAACATCAGGGATCATATCTCGAGATATGATCGGTGATGCCGGTTTTTG    |
| 2         | SHCLNV-NM_024408 | TRCN0000   | Notch2      | NM_024408-2-6334s21c1 | CCGGCAAGATCTCTGTTAGACCAATTTCTCGAAGAAATGGTGTAAACAGGATCTTTTTG   |
| 1         | SHCLNV-NM_024408 | TRCN0000   | Notch2      | NM_024408-2-6747s21c1 | CCGGCCACATCTCTGCCAATGATTACTCGAGTAATCATTTGGAGAGGATGTGGTTTTTG   |
| 2         | SHCLNV-NM_000435 | TRCN0000   | Notch3      | NM_000435-1-1431s1c1  | CCGGCCAGTTCACTGTAATCTGATCTCGAGATACAGATACAGGTTGAAGGTTGTTTTT    |
| 1         | SHCLNV-NM_000435 | TRCN0000   | Notch3      | NM_000435-2-1524s21c1 | CCGGTCTGCAAGGACCGGATCAATGCTCGAGCATTTGACTCGGTCTTGCAGATTTTTG    |

**Supplementary Table 6: List of antibodies**

| Antibody                 | Company/Source            | Antibody Information                                 |              |                   |              | Dilution  |  |
|--------------------------|---------------------------|------------------------------------------------------|--------------|-------------------|--------------|-----------|--|
|                          |                           | Catalog Number/Reference                             | Clone number | Description       | Western Blot | IFM-cells |  |
| Notch1                   | Cell Signaling Technology | 3608                                                 | D1E11        | Rabbit monoclonal | 1:1000       |           |  |
| Cleaved Notch1 (Val1744) | Cell Signaling Technology | 4147                                                 | D3B8         | Rabbit monoclonal | 1:1000       |           |  |
| Notch2                   | Cell Signaling Technology | 5732                                                 | D76A6        | Rabbit monoclonal | 1:1000       |           |  |
| Notch3                   | Cell Signaling Technology | 5276                                                 | D11B8        | Rabbit polyclonal | 1:1000       |           |  |
| Dll1                     |                           | S Estrach et al., J Cell Sci (2007), 120(16):2944-52 | Zdd2         | Mouse monoclonal  |              | 1:500     |  |
| anti-Integrin $\beta$ 1  | Cell Signaling Technology | 4706                                                 |              | Rabbit polyclonal | 1:1000       |           |  |
| anti-Involucrin          |                           | D Hudson et al., Hybridoma (1992), 11(3):367-379     | SY7          | Mouse monoclonal  | 1:1000       | 1:1500    |  |
| anti-Ki67                | Cell Signaling Technology | 9449                                                 | 8D5          | Mouse monoclonal  |              | 1:800     |  |
| anti- $\alpha$ -Tubulin  | Sigma-Aldrich             | T6199                                                | DM1A         | Mouse monoclonal  | 1:2000       |           |  |
| anti-Keratin 14          | Covance                   | PRB-155P                                             |              | Rabbit polyclonal | 1:1000       | 1:2000    |  |
| anti-TGM1                |                           | Thacher SM and Rice RH, Cell (1985), 40:685-695      | BC.1         | Mouse monoclonal  |              | 1:1500    |  |
| anti-GADPH               | Millipore                 | MAB374                                               | 6C5          | Mouse monoclonal  | 1:1000       |           |  |
| anti-E-cadherin          |                           | Shimoyama et al., Cancer Res (1989), 49:2128-2133    | HECD-1       | Mouse monoclonal  |              | 1:500     |  |
| anti-alpha-Catenin       | Cell Signaling Technology | 3236                                                 |              | Rabbit polyclonal |              | 1:200     |  |
